# Supplementary material for: The Video Head Impulse Test (vHIT) Detects Vertical Semicircular Canal Dysfunction
Source: PubMed Central journal article supplement (PMC3632590; doi:10.1371/journal.pone.0061488), 2013-04-22

## NORMALS

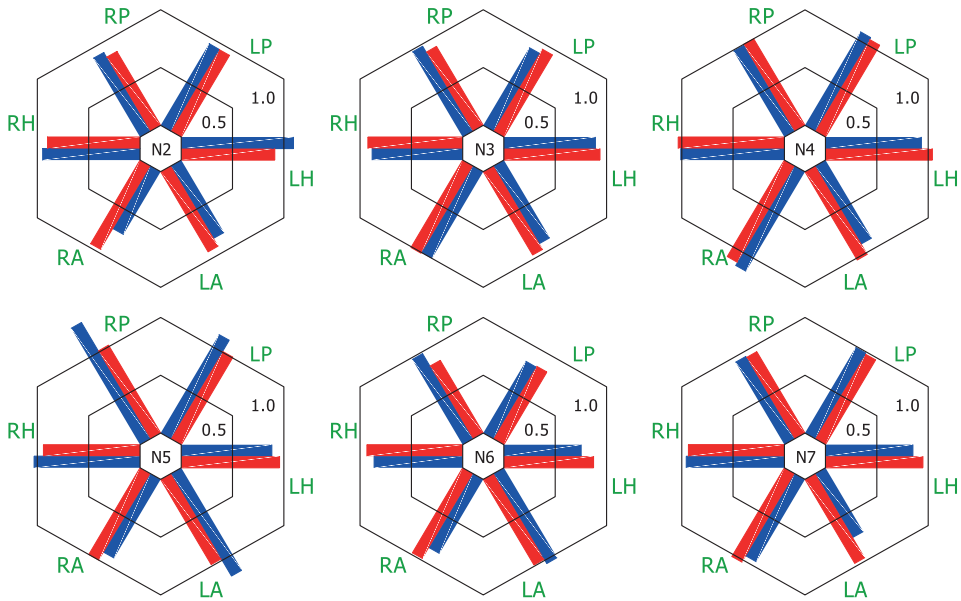

## PATIENTS

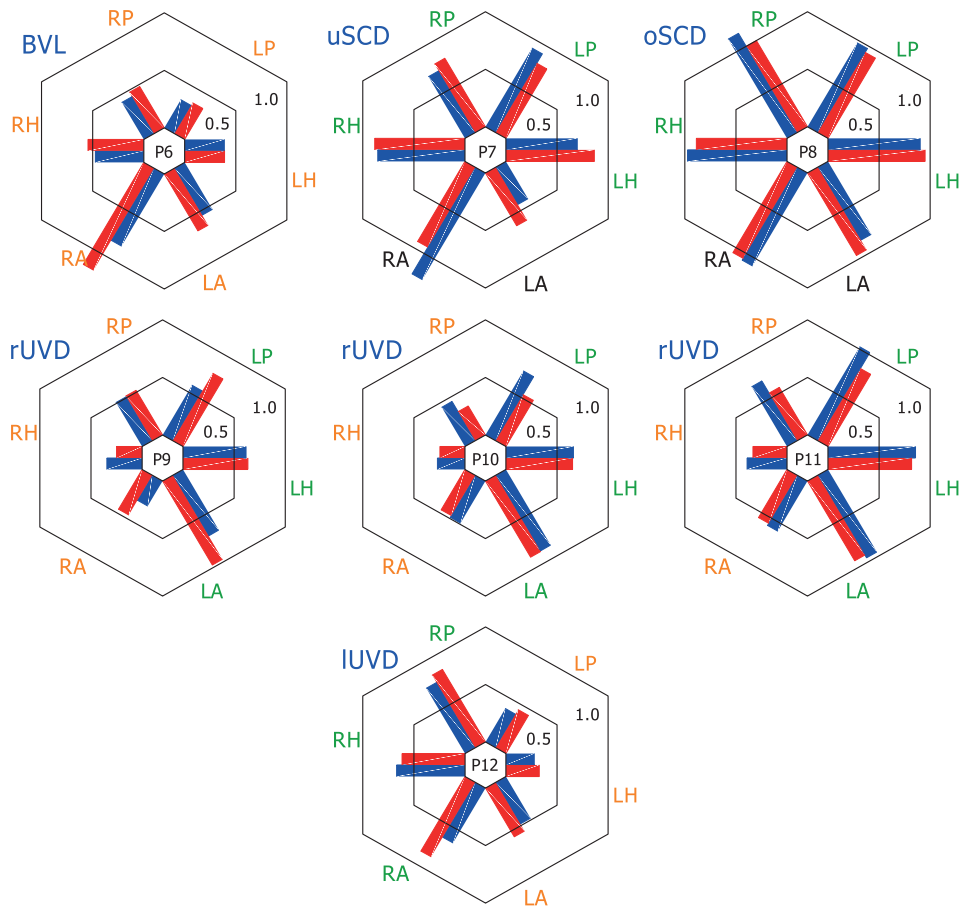

Supplement: pone.0061488.s003.pdf [file pone.0061488.s003.pdf]
