# Supplementary material for: The Video Head Impulse Test (vHIT) Detects Vertical Semicircular Canal Dysfunction
Source: PLOS journal article supplement (doi:10.1371/journal.pone.0061488), 2013-04-22

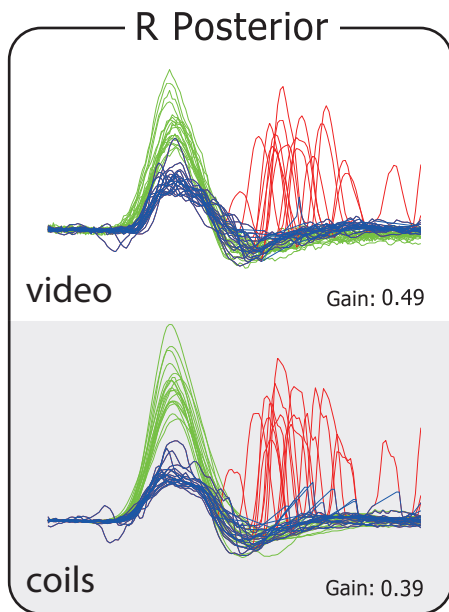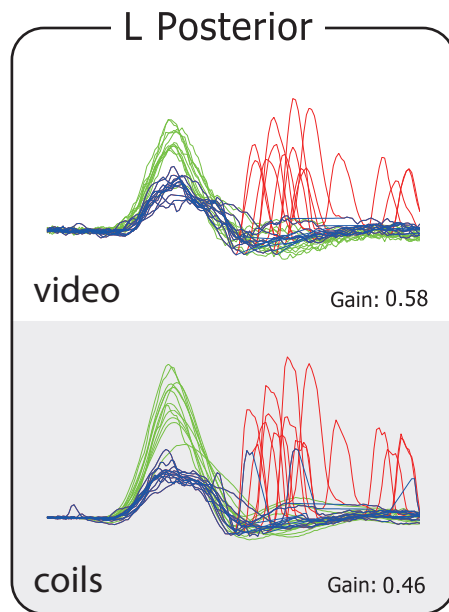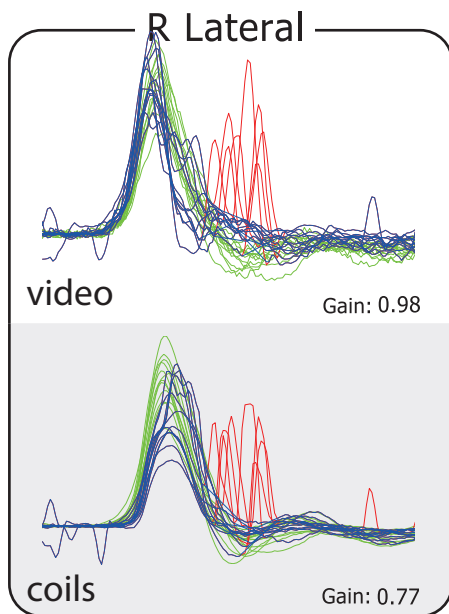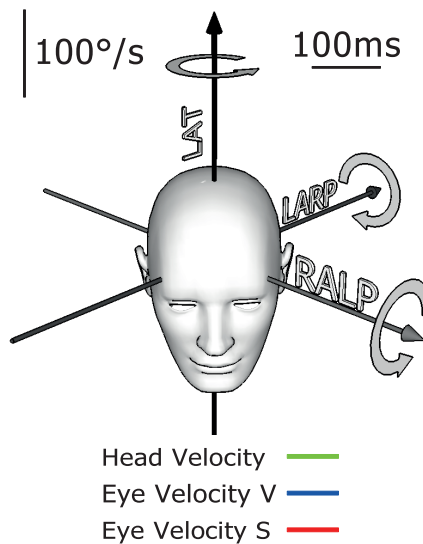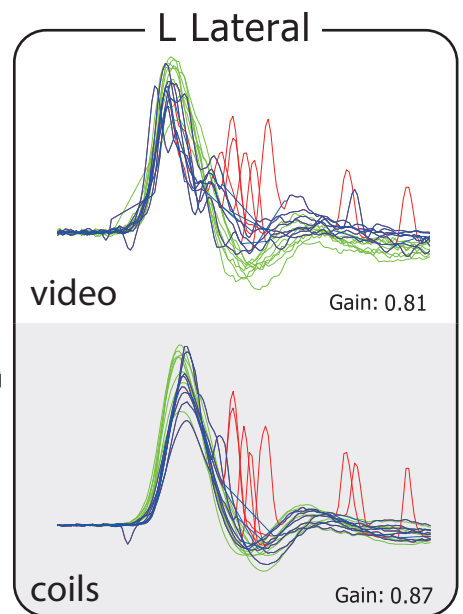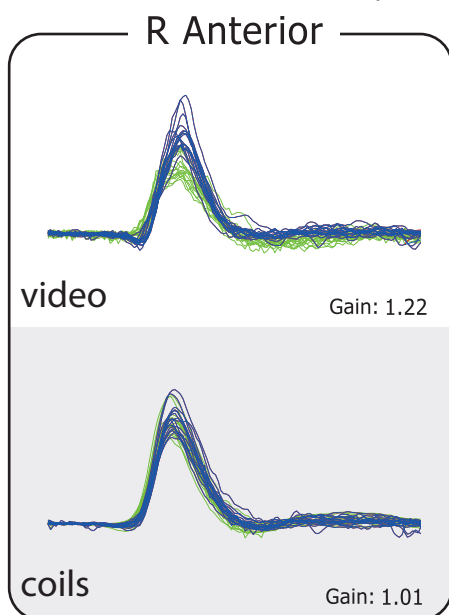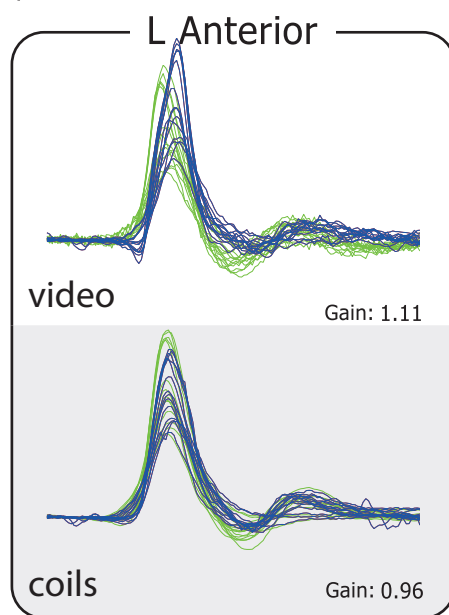

Supplement: S2 (10.1371/journal.pone.0061488.s002) [file journal.pone.0061488.s002]
